# Supplementary material for: Stepwise radical cation Diels–Alder reaction via multiple pathways
Source: publisher site journal article supplement (doi:10.3762/bjoc.14.59), 2018-03-27

## Supporting Information

for

# Stepwise radical cation Diels–Alder reaction via multiple pathways

Ryo Shimizu<sup>1</sup>, Yohei Okada<sup>2</sup> and Kazuhiro Chiba\*<sup>1</sup>

Address: <sup>1</sup>Department of Applied Biological Science, Tokyo University of Agriculture and Technology, 3-5-8 Saiwai-cho, Fuchu, Tokyo 183-8509, Japan and <sup>2</sup>Department of Chemical Engineering, Tokyo University of Agriculture and Technology, 2-24-16 Naka-cho, Koganei, Tokyo 184-8588, Japan

Email: Kazuhiro Chiba - chiba@cc.tuat.ac.jp

Tel: (+81)-42-367-5667

Fax: (+81)-42-367-5667

\*Corresponding author

**Additional scheme and figures, general remarks, synthesis and characterization data,  
including copies of <sup>1</sup>H and <sup>13</sup>C NMR spectra**

### Table of contents

1. Additional scheme and figures p. S2
2. General remarks p. S4
3. Synthesis and characterization data p. S5
4. Copies of <sup>1</sup>H and <sup>13</sup>C NMR spectra p. S9

## 1. Additional scheme and figures

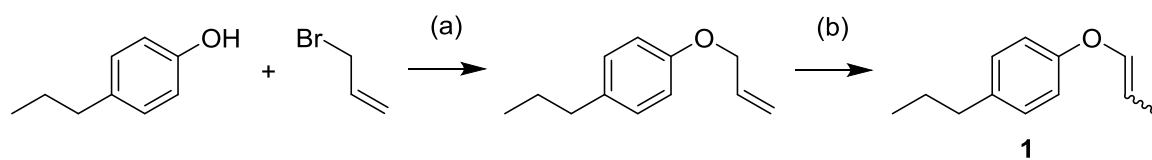

Conditions: (a) Allyl bromide, K<sub>2</sub>CO<sub>3</sub>, DMF. (b) *t*-BuOK, DMSO.

**Scheme S1:** Synthesis of the aryl vinyl ether **1**.

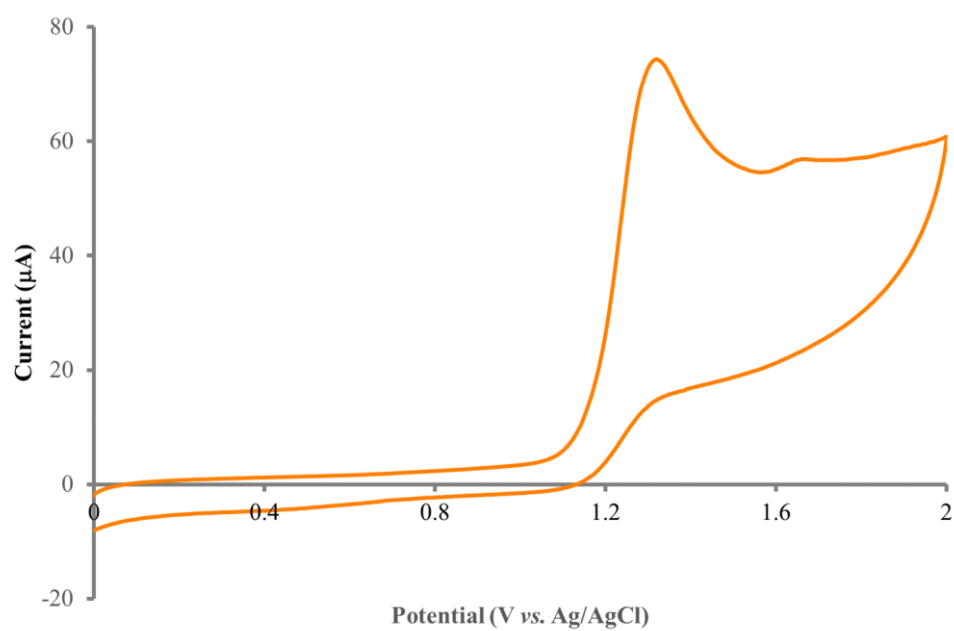

**Figure S1:** Cyclic voltammogram of the aryl vinyl ether **1**.

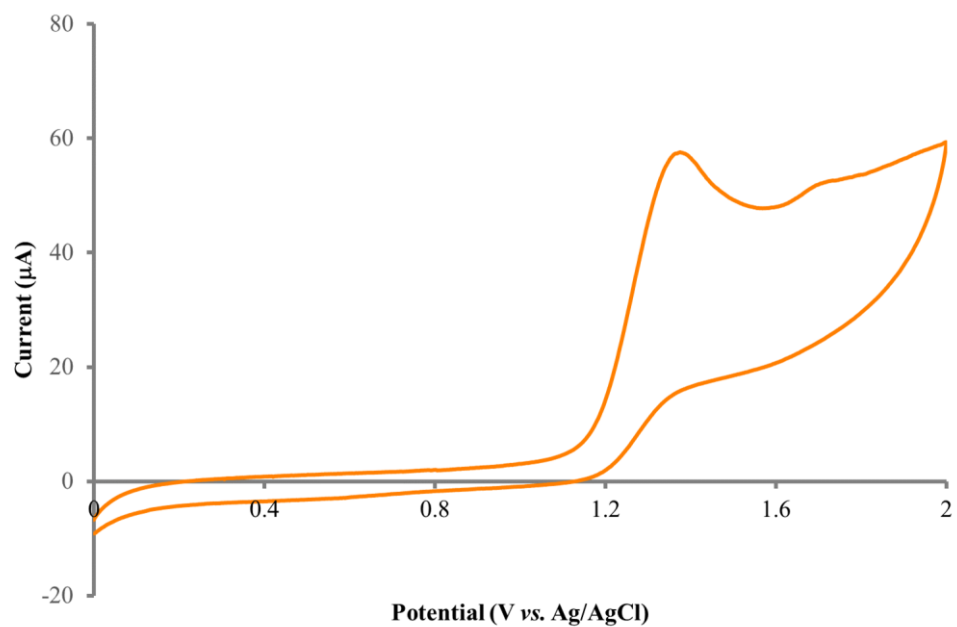

**Figure S2:** Cyclic voltammogram of the vinyl cyclobutane **4**.

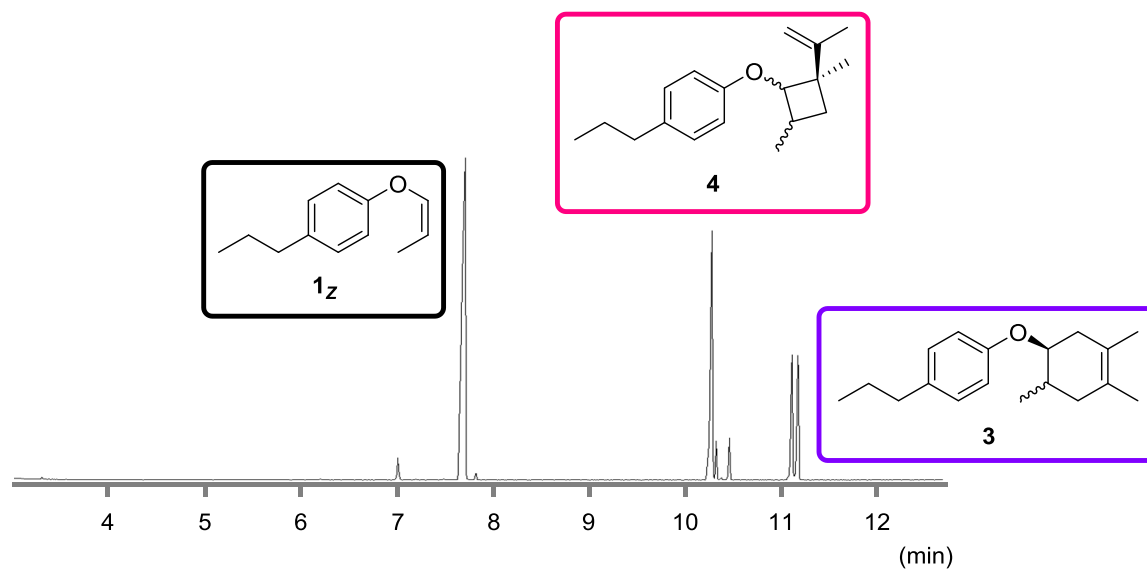

**Figure S3:** GC-MS Profile of the Reaction at 0.1 F/mol.

## 2. General remarks

All reagents and solvents were purchased from commercial sources and used without further purification. Reactions were monitored by thin-layer chromatography (TLC) carried out on silica gel plates, with detection by UV absorption (254 nm) and by heating the plates after dipping them in a solution of 12 molybdo(VI) phosphoric acid *n*-hydrate in 95% ethanol. Silica gel (particle size 40–50  $\mu\text{m}$ ) was used for column chromatography.  $^1\text{H}$  NMR spectra were collected on 600 or 400 MHz NMR spectrometers using the deuterated solvent as an internal deuterium reference. Chemical shift data are given in  $\delta$  units calibrated with residual protic solvent. The multiplicity of a signal is indicated as follows: s, singlet; d, doublet; t, triplet; q, quartet; quin, quintet; m, multiplet.  $^{13}\text{C}$  NMR spectra were collected on 150 or 100 MHz spectrometers with proton decoupling using the deuterated solvent as an internal carbon reference.

### 3. Synthesis and Characterization Data

#### *(Z)*-1-(Prop-1-en-1-yloxy)-4-propylbenzene (**1<sub>Z</sub>**)

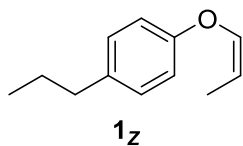

To a solution of 4-propylphenol in DMF, allyl bromide (3.0 equiv.) and  $K_2CO_3$  (4.5 equiv.) were added. The resulting reaction mixture was stirred at 70 °C until completion of the reaction (determined by TLC), followed by dilution with EtOAc. The organic layer was washed with brine, dried over  $MgSO_4$ , and concentrated in vacuo. Purification by silica gel column chromatography (Hex/EtOAc) gave the desired allylated compounds. To a solution of the resulting allylated compound in DMSO, *t*-BuOK (8.0 equiv) was added. The resulting reaction mixture was stirred at room temperature for 6 h, followed by dilution with Hex. The layers were separated, the DMSO layer was extracted several times with Hex, and the combined Hex phases were washed with brine, dried over  $MgSO_4$ , and concentrated in vacuo. Purification by silica gel column chromatography (Hex/EtOAc) gave the desired aryl vinyl ether.  $^1H$  NMR (600 MHz,  $CDCl_3$ )  $\delta$  7.10 (2H, d,  $J = 8.7$  Hz), 6.90 (2H, d,  $J = 8.7$  Hz), 6.35 (1H, dq,  $J = 5.9, 2.1$  Hz), 4.84 (1H, dq,  $J = 6.8, 6.8$  Hz), 2.54 (2H, t,  $J = 7.3$  Hz), 1.71 (3H, dd,  $J = 6.8, 2.1$  Hz), 1.61 (2H, sext,  $J = 7.3$  Hz), 0.93 (3H, t,  $J = 7.3$  Hz);  $^{13}C$  NMR (150 MHz,  $CDCl_3$ )  $\delta$  155.7, 141.3, 136.7, 129.5, 116.1, 106.9, 37.3, 24.8, 13.8, 9.4.

#### *(E)*-1-(Prop-1-en-1-yloxy)-4-propylbenzene (**1<sub>E</sub>**)

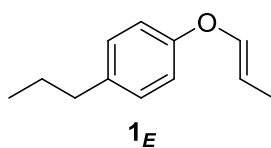

$^1\text{H}$  NMR (600 MHz,  $\text{CDCl}_3$ )  $\delta$  7.10 (2H, d,  $J = 8.7$  Hz), 6.89 (2H, d,  $J = 8.7$  Hz), 6.40 (1H, dq,  $J = 12.1, 1.9$  Hz), 5.33 (1H, dq,  $J = 12.4, 6.9$  Hz), 2.54 (2H, t,  $J = 7.3$  Hz), 1.66 (3H, dd,  $J = 6.9, 1.9$  Hz), 1.61 (2H, sext,  $J = 7.3$  Hz), 0.93 (3H, t,  $J = 7.3$  Hz);  $^{13}\text{C}$  NMR (150 MHz,  $\text{CDCl}_3$ )  $\delta$  155.5, 142.5, 136.8, 129.5, 116.2, 107.7, 37.3, 24.8, 13.8, 12.4.

*1-Propyl-4-((3,4,6-trimethylcyclohex-3-en-1-yl)oxy)benzene (3)*

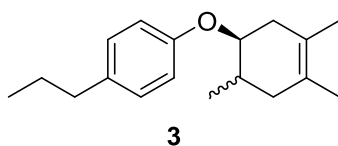

To a solution of lithium perchlorate (1.06 g, 10.0 mmol) in nitromethane (10 mL) stirred at rt was added 1-(prop-1-en-1-yloxy)-4-propylbenzene (**1**, 148  $\mu\text{L}$ , 0.8 mmol) and 2,3-dimethyl-1,3-butadiene (**2**, 180  $\mu\text{L}$ , 1.6 mmol). The resulting reaction mixture was electrolyzed at r.t. using carbon felt electrodes (2 cm  $\times$  2 cm) in an undivided cell with stirring at a constant potential of 1.2 V vs Ag/AgCl. After completion (monitored by TLC and GC-MS), the reaction mixture was diluted with EtOAc and washed with brine. The organic layer was dried over  $\text{MgSO}_4$ , filtered, and concentrated in vacuo to give a crude product as a yellow oil. Silica gel column chromatography (EtOAc/Hex = 1:150) gave the title compound as a colorless oil. *cis*:  $^1\text{H}$  NMR ( $\text{CDCl}_3$ , 600 MHz)  $\delta$  7.05 (2H, d,  $J = 8.9$  Hz), 6.82 (2H, d,  $J = 8.9$  Hz), 4.38 (1 H, td,  $J = 5.5, 2.8$  Hz), 2.51 (2H, t,  $J = 7.6$  Hz), 2.24-2.21 (2H, m), 2.11-2.03 (2H, m), 2.02-1.95 (1H, m), 1.64-1.57 (8H, m), 0.99 (3H, d,  $J = 6.9$  Hz), 0.93 (3H, t,  $J = 7.6$  Hz);  $^{13}\text{C}$  NMR (150 MHz,  $\text{CDCl}_3$ )  $\delta$  156.5, 134.7, 129.3, 124.6, 121.8, 115.9, 76.0, 37.3, 36.9, 35.0, 31.5, 24.9, 19.1, 18.6, 15.4, 13.9. *trans*:  $^1\text{H}$  NMR (600 MHz,  $\text{CDCl}_3$ )  $\delta$  7.07 (2H, d,  $J = 8.2$  Hz), 6.85 (2H, d,  $J = 8.2$  Hz), 4.05 (1H, td,  $J = 8.6, 5.5$  Hz), 2.51 (2H, t,  $J = 7.6$  Hz), 2.41 (1H, dd,  $J = 17.2, 4.8$  Hz), 2.18 (1H, dd,  $J = 17.2, 4.8$  Hz), 2.07 (1H, dd,  $J = 16.5, 7.6$  Hz), 2.03-1.95 (1H, m),

1.84-1.76 (1H, m), 1.64-1.57 (8H, m), 1.04 (3H, d,  $J = 6.9$  Hz), 0.93 (3H, t,  $J = 7.6$  Hz);  $^{13}\text{C}$  NMR (150 MHz,  $\text{CDCl}_3$ )  $\delta$  156.7, 134.8, 129.4, 125.0, 122.9, 115.9, 79.0, 39.5, 37.3, 37.0, 34.1, 24.9, 18.9, 18.6, 17.9, 14.0; HRMS  $[\text{M} + \text{H}]^+$  calculated for  $\text{C}_{18}\text{H}_{27}\text{O}$  259.2062, found 259.2054.

*1-(2,4-Dimethyl-2-(prop-1-en-2-yl)cyclobutoxy)-4-propylbenzene (4)*

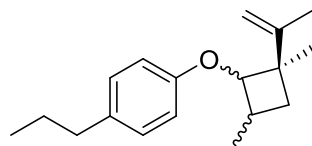

**4**

To a solution of lithium perchlorate (1.06 g, 10.0 mmol) in nitromethane (10mL) stirred at rt was added 1-(prop-1-en-1-yloxy)-4-propylbenzene (**1**) (148  $\mu\text{L}$ , 0.8 mmol) and 2,3-dimethyl-1,3-butadiene (**2**) (180  $\mu\text{L}$ , 1.6 mmol). The resulting reaction mixture was electrolyzed at rt using carbon felt electrodes (2 cm  $\times$  2 cm) in an undivided cell with stirring at a constant potential of 1.2 V vs. Ag/AgCl. After the passage of 0.1 F/mol, the reaction mixture was diluted with EtOAc and washed with brine. The organic layer was dried over  $\text{MgSO}_4$ , filtered, and concentrated in vacuo to give a crude product as a yellow oil. Silica gel column chromatography (EtOAc/Hex = 1:150) gave the title compound as a colorless oil. *One Diastereomer*:  $^1\text{H}$  NMR (600 MHz,  $\text{CDCl}_3$ )  $\delta$  7.05 (2H, d,  $J = 8.2$  Hz), 6.83 (2H, d,  $J = 8.2$  Hz), 4.68 (1H, t,  $J = 1.4$  Hz), 4.63 (1H, s), 4.12 (1H, d,  $J = 7.3$  Hz), 2.51 (2H, t,  $J = 7.3$  Hz), 2.44-2.36 (1H, m), 1.83 (1H, t,  $J = 10.1$  Hz), 1.67 (3H, s), 1.60 (2H, sext,  $J = 7.3$  Hz), 1.36 (1H, t,  $J = 10.1$  Hz), 1.32 (3H, s), 1.19 (3H, d,  $J = 6.4$  Hz), 0.92 (3H, t,  $J = 7.3$  Hz);  $^{13}\text{C}$  NMR (150 MHz,  $\text{CDCl}_3$ )  $\delta$  156.6, 152.6, 135.2, 129.3, 116.3, 108.0, 83.9, 47.2, 37.3, 33.8, 33.5, 24.8, 20.2, 19.8, 18.9, 13.9; HRMS  $[\text{M} + \text{H}]^+$  calculated for  $\text{C}_{18}\text{H}_{27}\text{O}$  259.2062, found 259.2059.

To a solution of lithium perchlorate (1.06 g, 10.0 mmol) in nitromethane (10mL) stirred at r.t. was added 1-(prop-1-en-1-yloxy)-4-propylbenzene (**1**, 148  $\mu$ L, 0.8 mmol) and 2,3-dimethyl-1-butene (1.98mL, 16 mmol). The resulting reaction mixture was electrolyzed at r.t. using carbon felt electrodes (2 cm  $\times$  2 cm) in an undivided cell with stirring at a constant potential of 1.2 V vs. Ag/AgCl. After the passage of 0.8 F/mol, the reaction mixture was diluted with EtOAc and washed with brine. The organic layer was dried over MgSO<sub>4</sub>, filtered, and concentrated in vacuo to give a crude product as a yellow oil. Silica gel column chromatography (EtOAc : Hex = 1 : 150) gave the title compound as a colorless oil. *One Diastereomer*: <sup>1</sup>H NMR (600 MHz, CDCl<sub>3</sub>)  $\delta$  7.06 (2H, d,  $J$  = 8.3 Hz), 6.78 (2H, d,  $J$  = 8.3 Hz), 3.93 (1H, d,  $J$  = 7.6 Hz), 2.51 (2H, t,  $J$  = 7.6 Hz), 2.38-2.31 (1H, m), 2.09 (1H, quin,  $J$  = 6.9 Hz), 2.01 (1H, t,  $J$  = 10.6 Hz), 1.60 (2H, sext,  $J$  = 7.6 Hz), 1.15 (3H, d,  $J$  = 6.9 Hz), 1.13 (3H, s), 0.94-0.91 (4H, m), 0.87 (3H, d,  $J$  = 6.9 Hz), 0.84 (3H, d,  $J$  = 6.9 Hz); <sup>13</sup>C NMR (150 MHz, CDCl<sub>3</sub>)  $\delta$  157.2, 134.6, 129.3, 115.3, 87.2, 45.1, 37.3, 33.6, 33.3, 30.1, 24.9, 22.5, 20.0, 18.7, 17.9, 13.4; HRMS [M + H]<sup>+</sup> calculated for C<sub>18</sub>H<sub>29</sub>O: 261.2218, found: 261.2225.



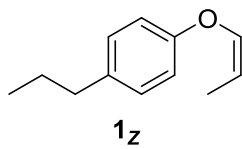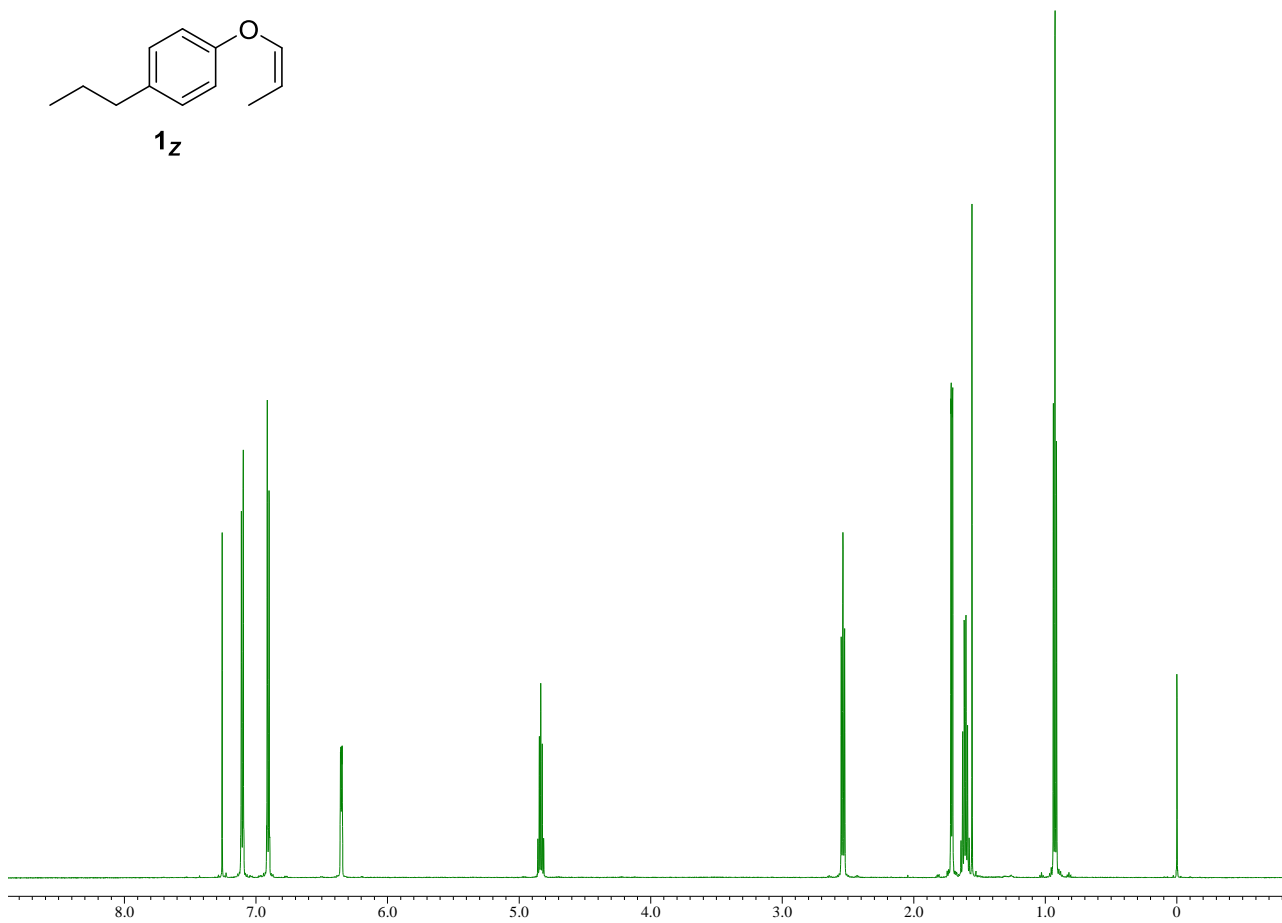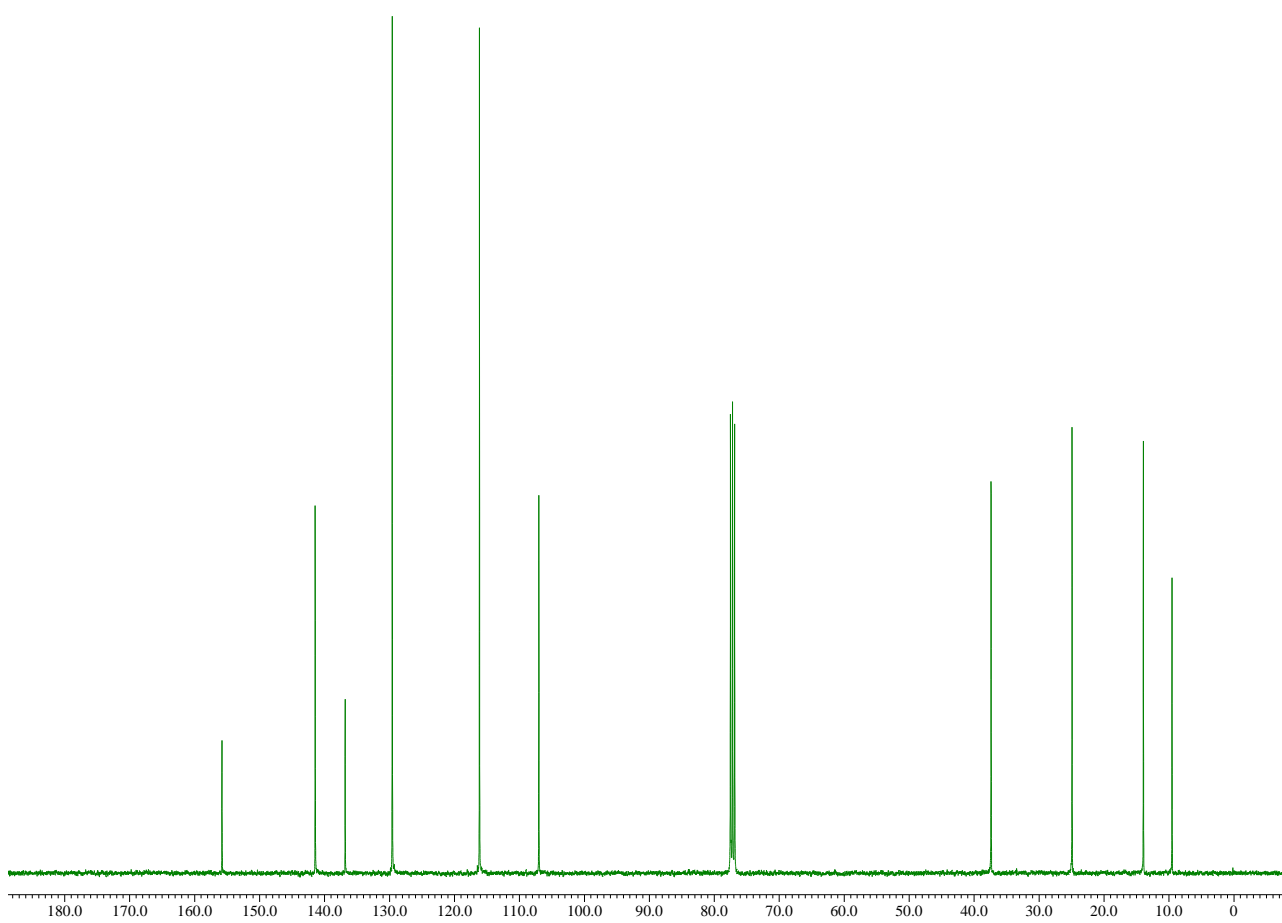

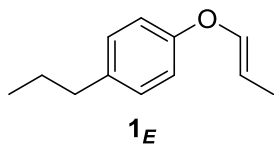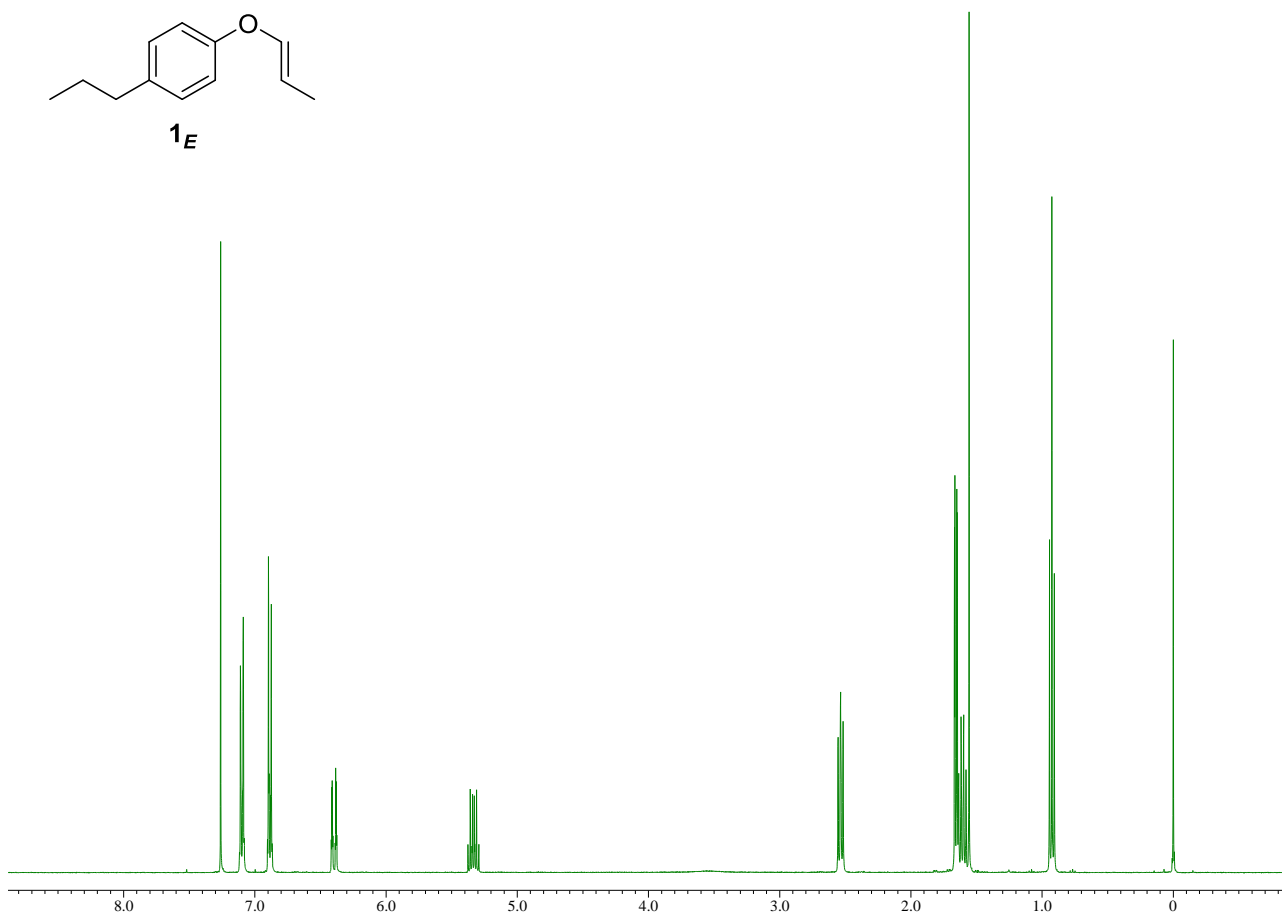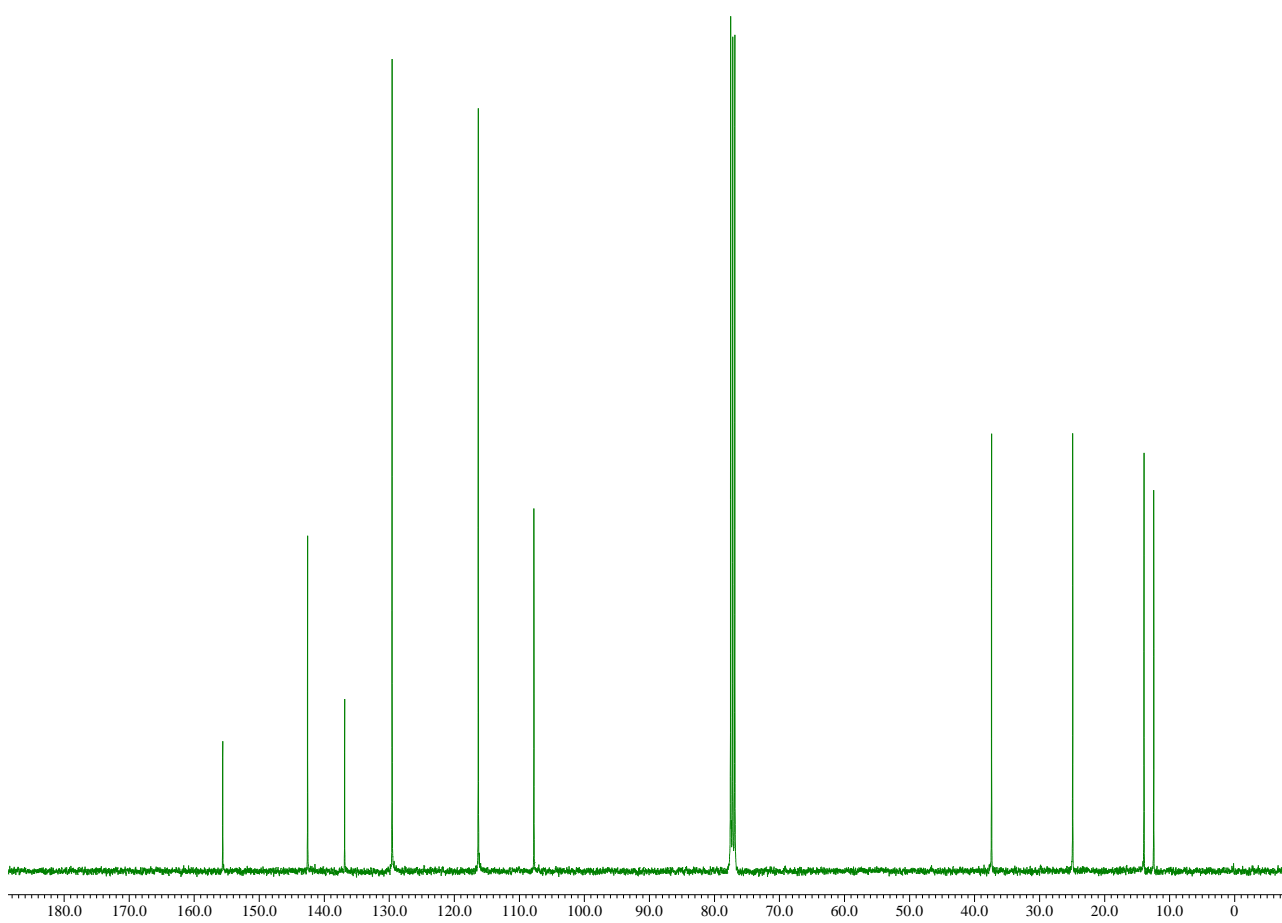

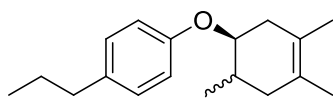

**3**

*Mixture of Diastereomers*

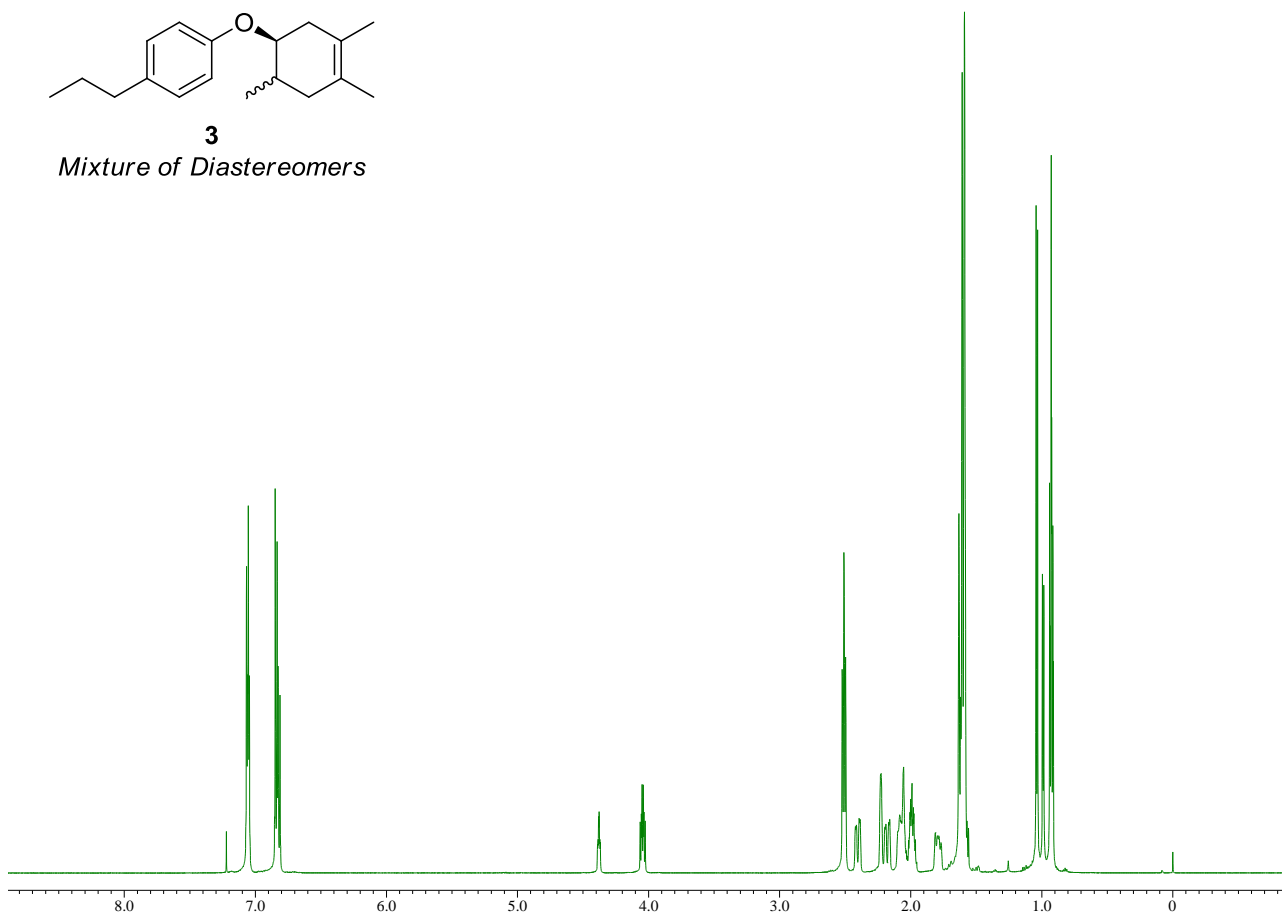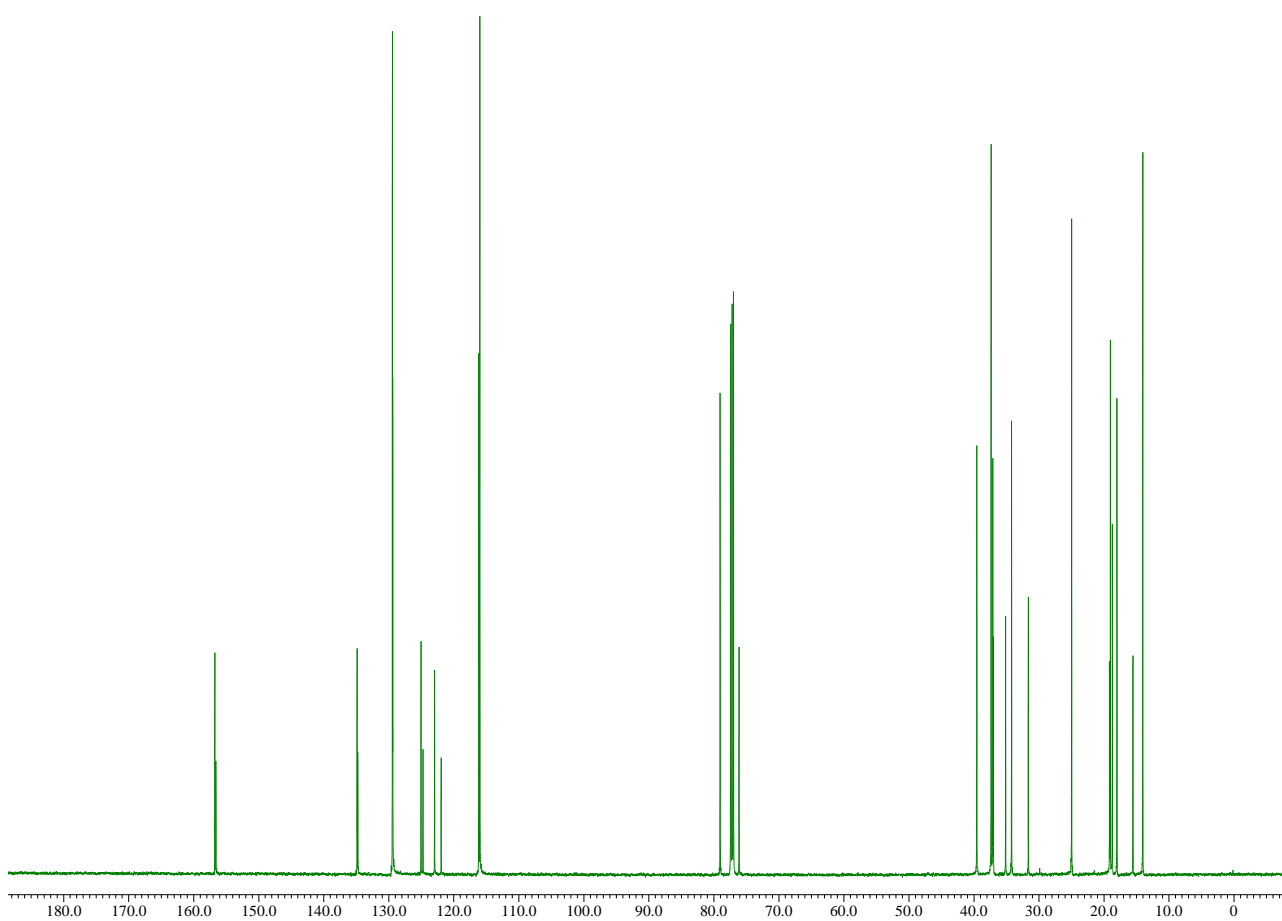

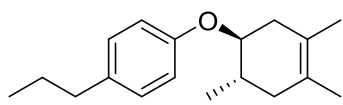

3f

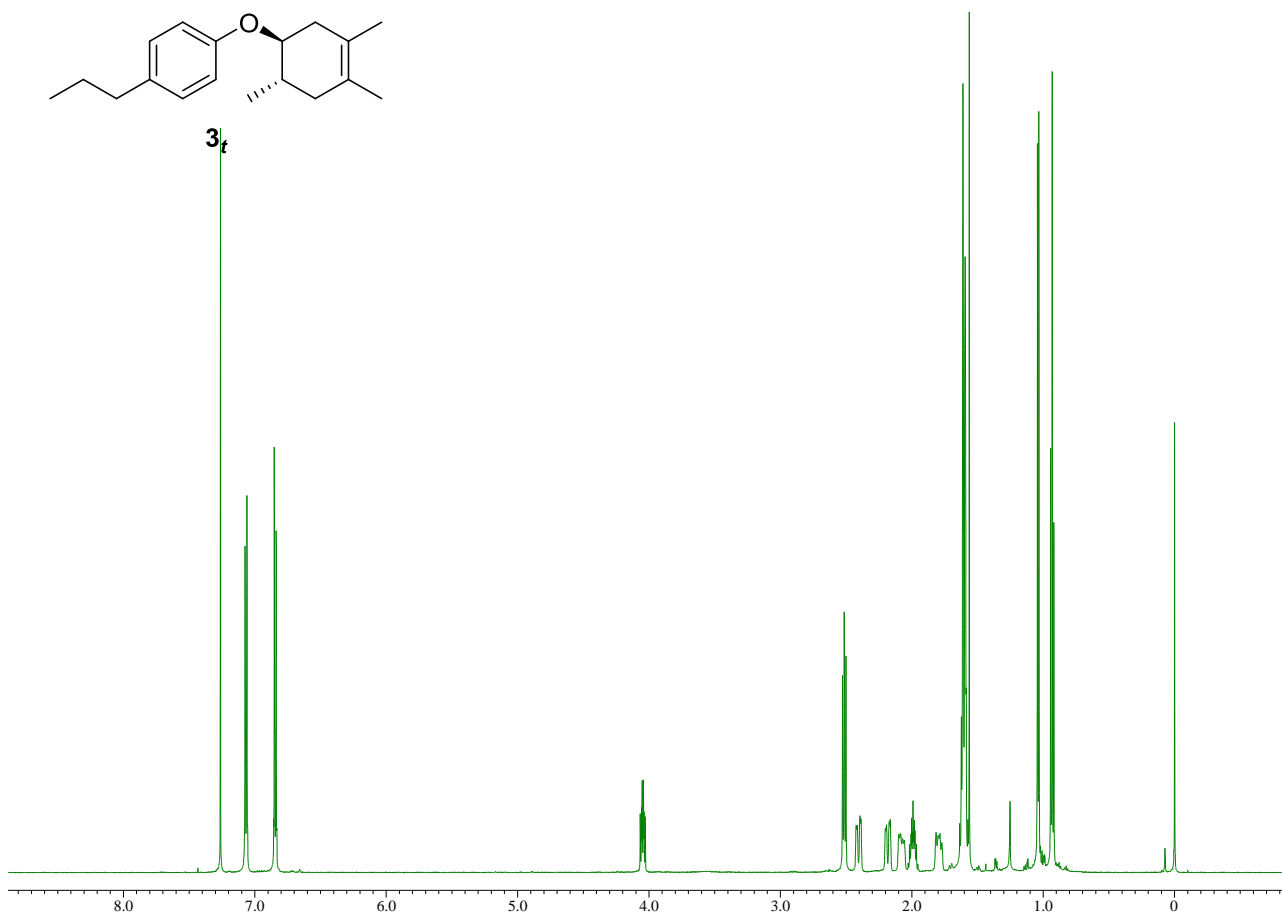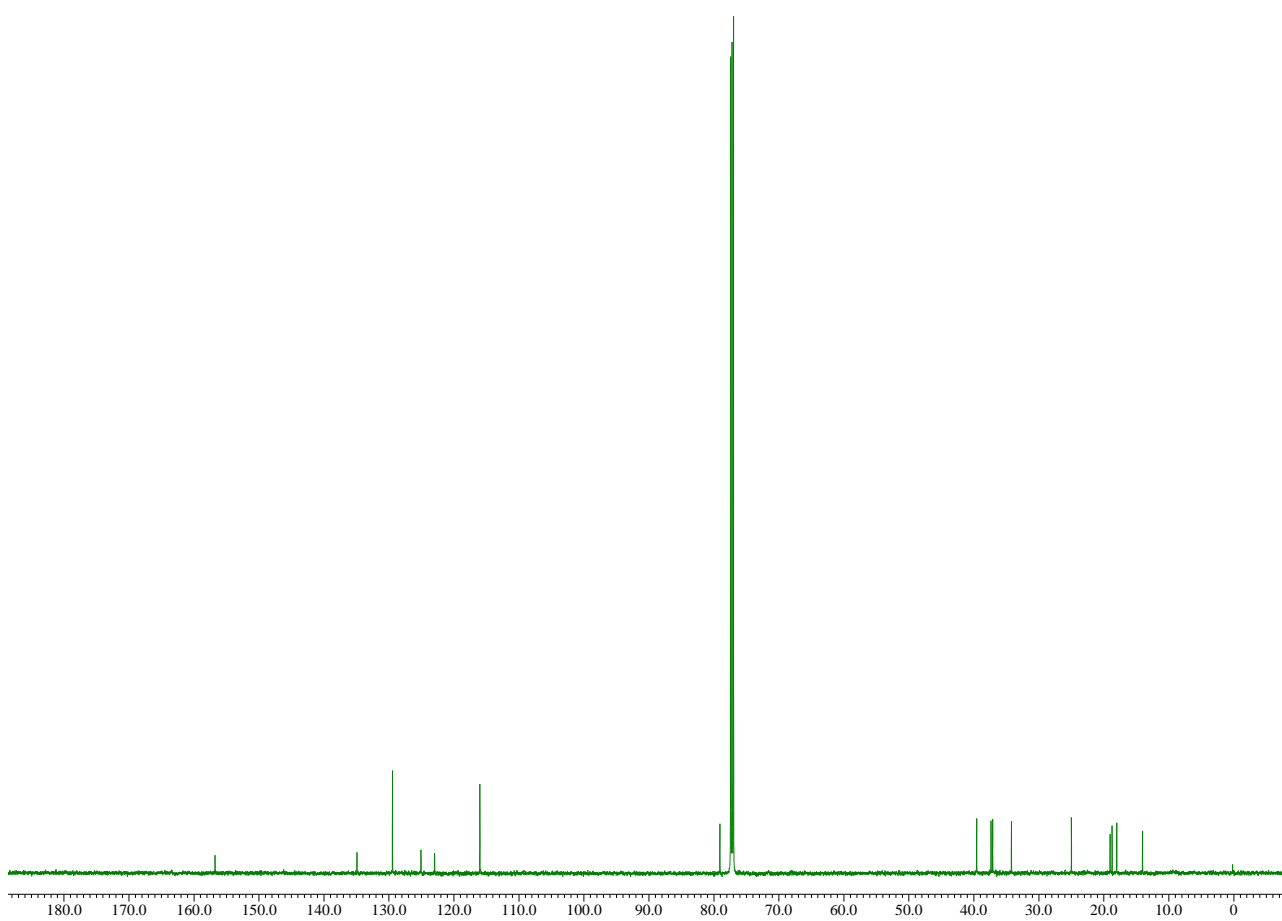

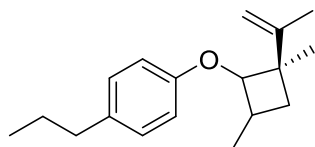

**4**

*One Diastereomer*

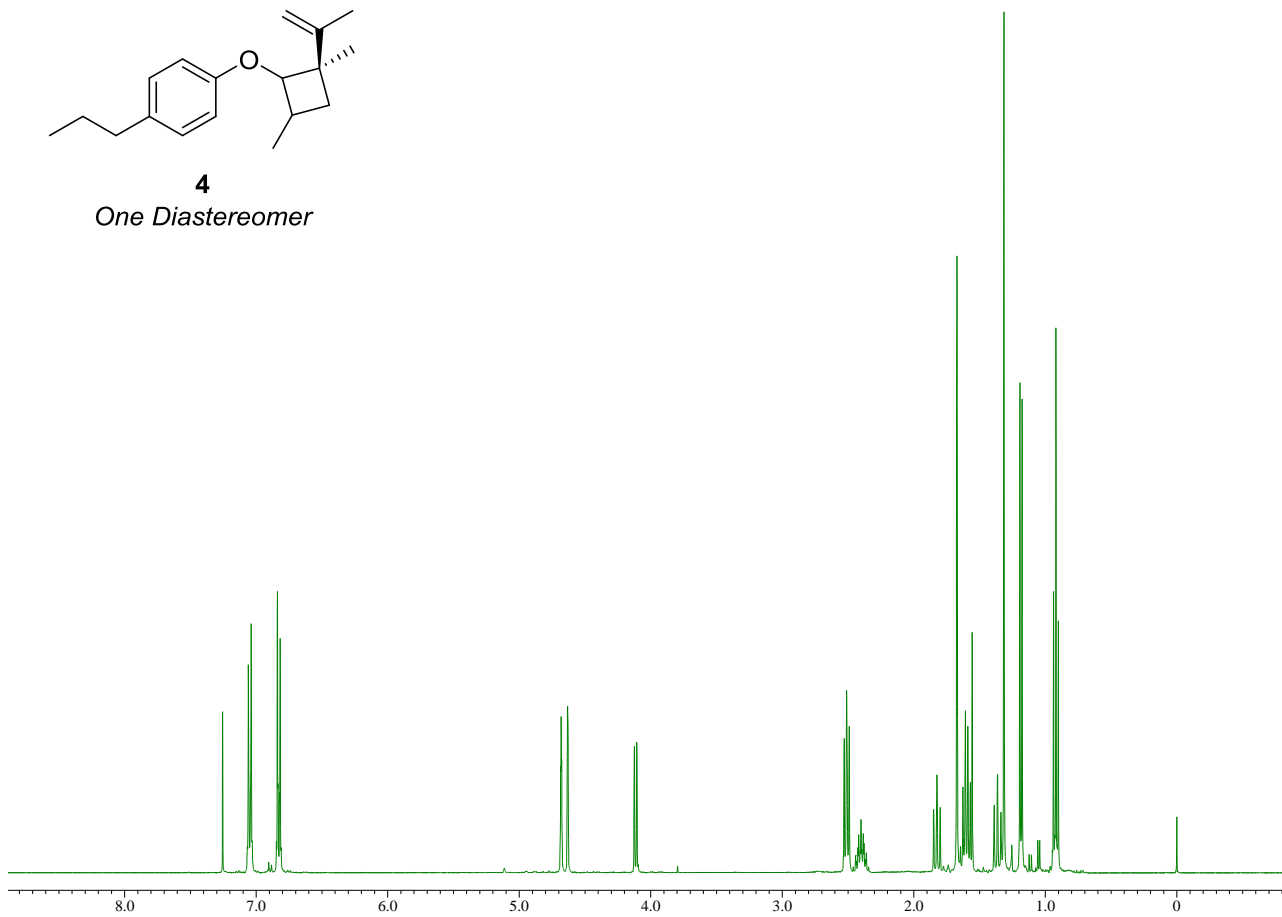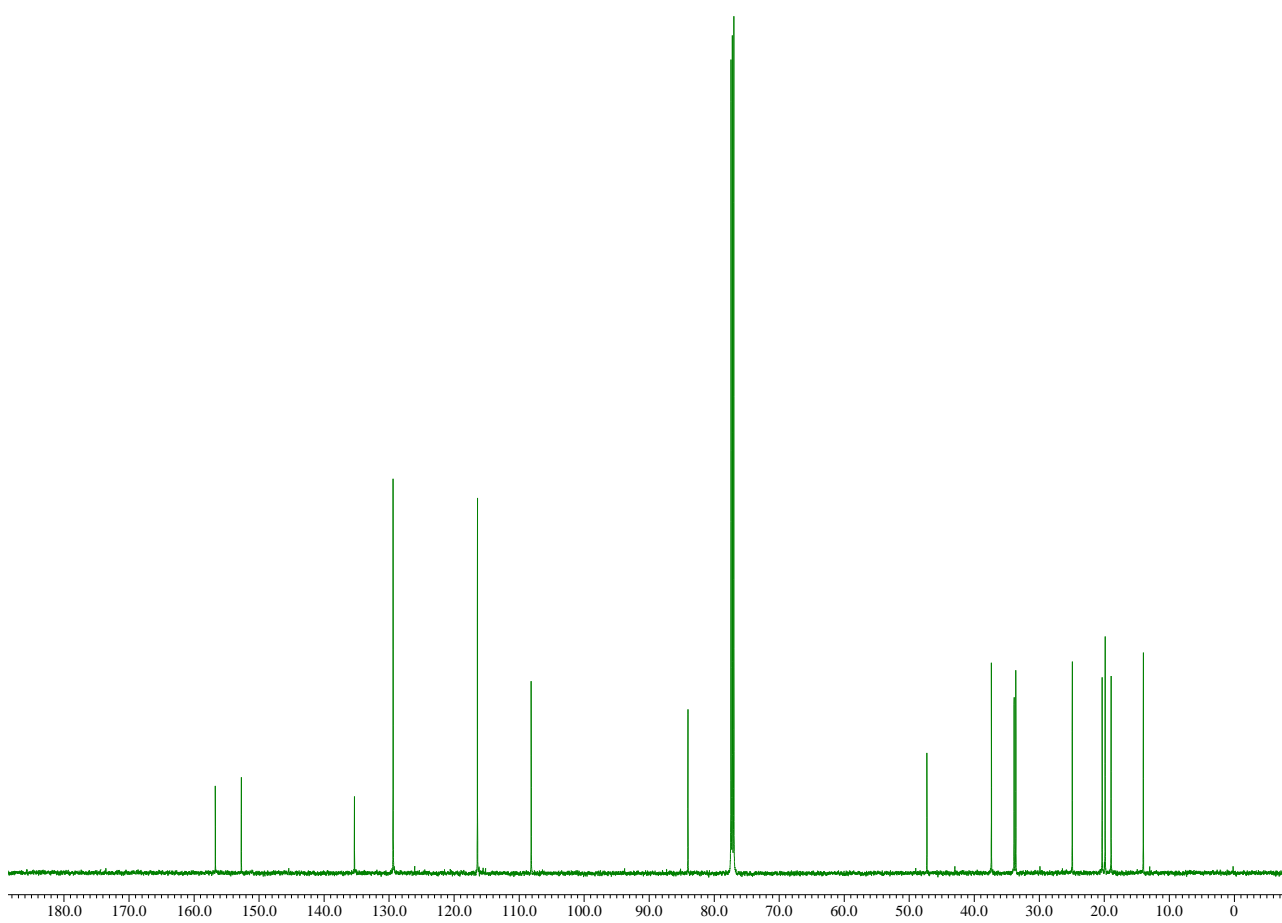

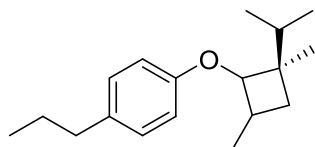

**5**

*One Diastereomer*

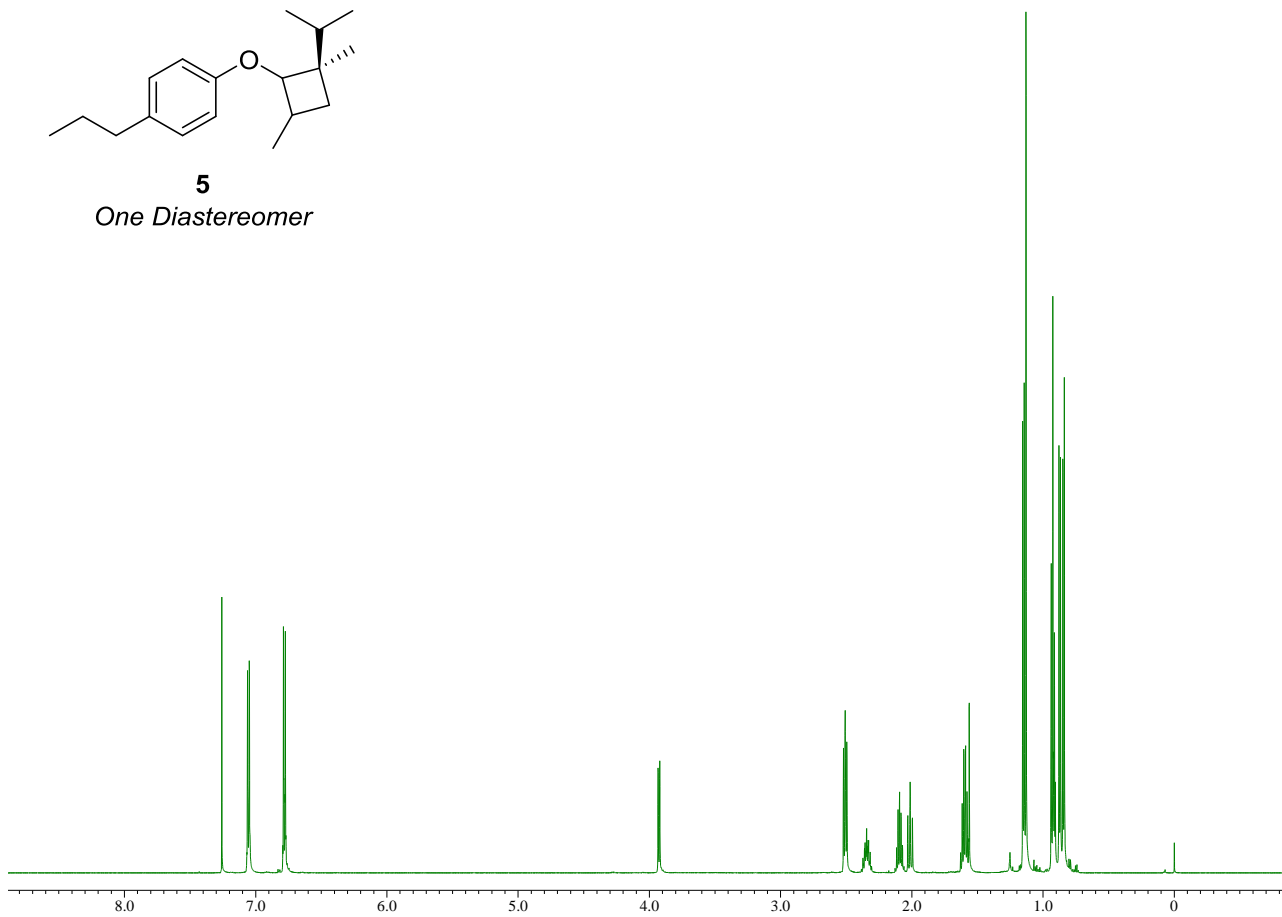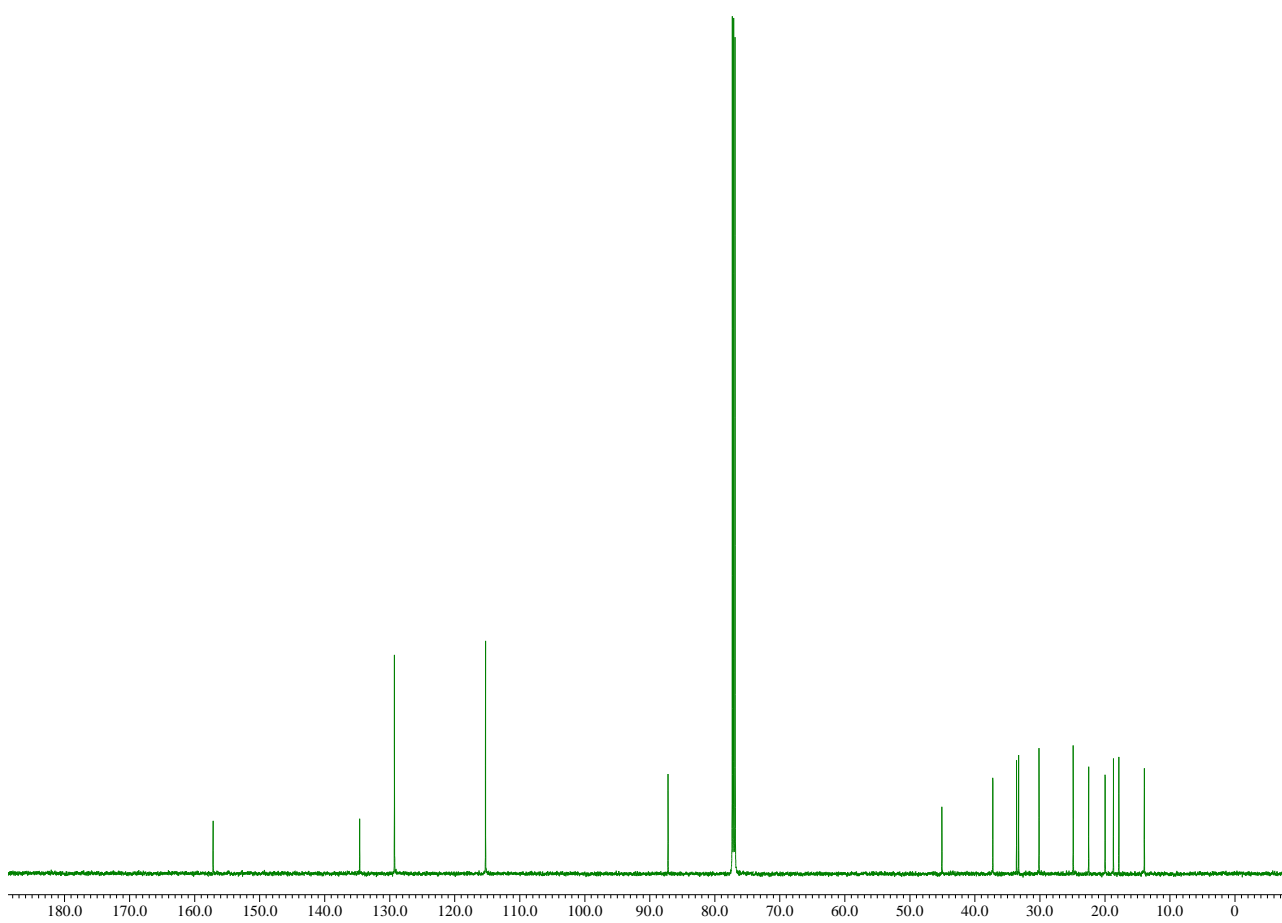

Supplement: Additional file 1 [file 1860-5397-14-59-S1.pdf]
